# Supplementary figures and images for: Myosin V functions as a vesicle tether at the plasma membrane to control neurotransmitter release in central synapses
Source: eLife journal article supplement (doi:10.7554/elife.39440), 2018-10-15

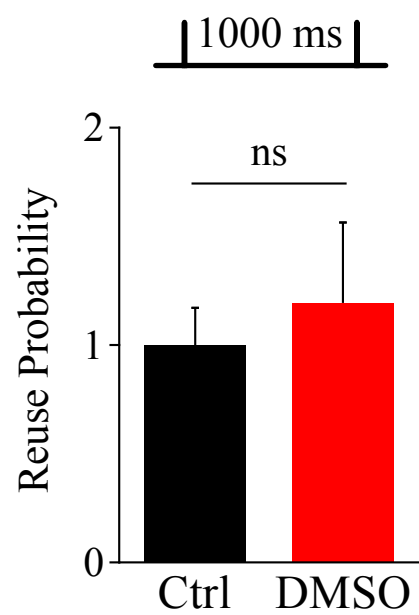

Supplement: supp [file elife_poa_e39440_Figure_1_figure_supplement_1.pdf › elife_poa_e39440_Figure_1_figure_supplement_1.pdf]

A

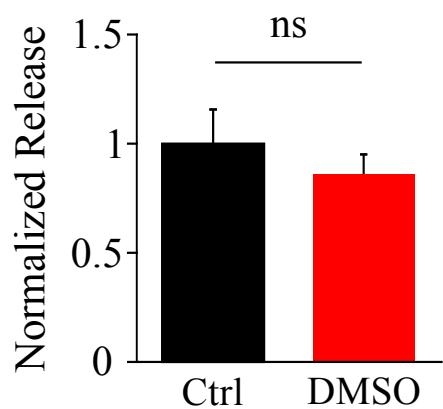

B

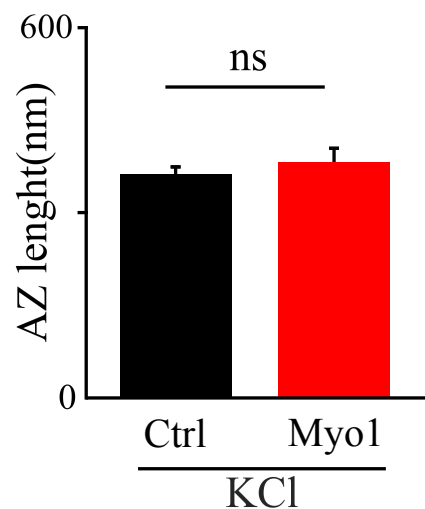

C

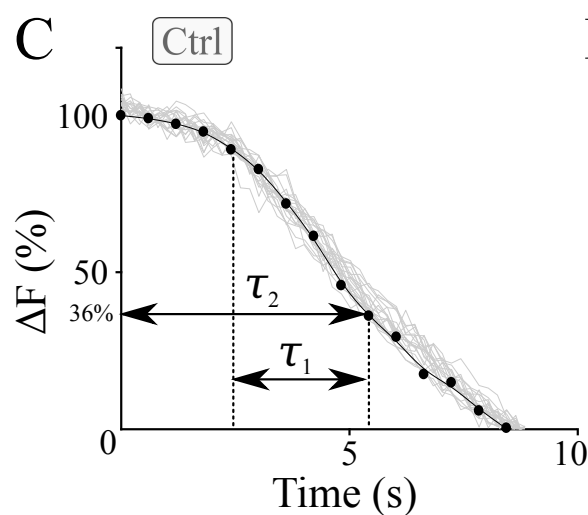

D

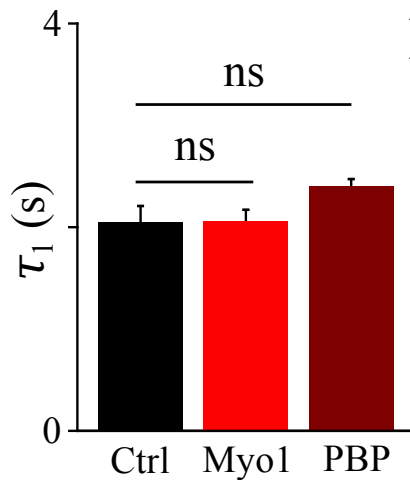

E

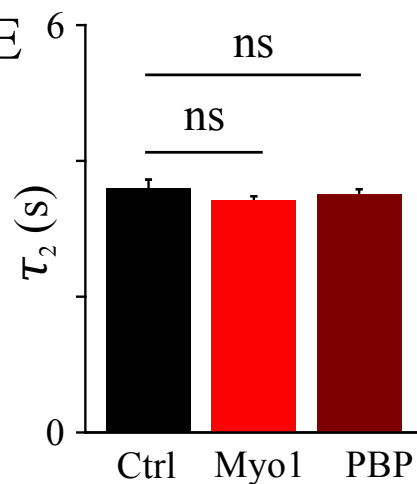

F

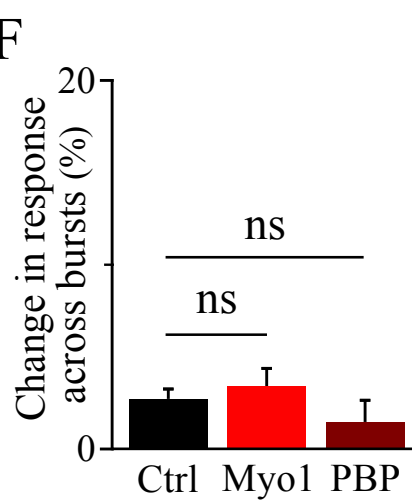

G

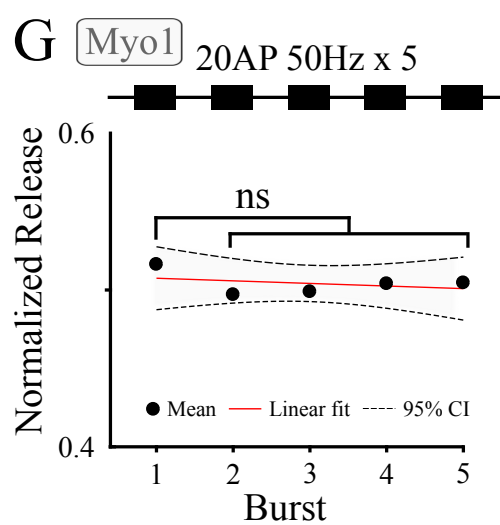

H

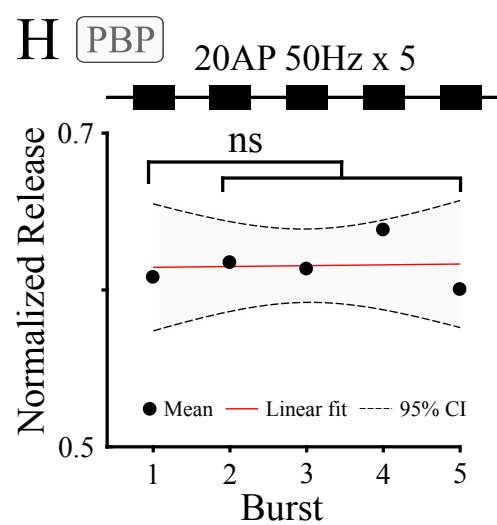

Supplement: supp [file elife_poa_e39440_Figure_2_figure_supplement_1.pdf › elife_poa_e39440_Figure_2_figure_supplement_1.pdf]

A

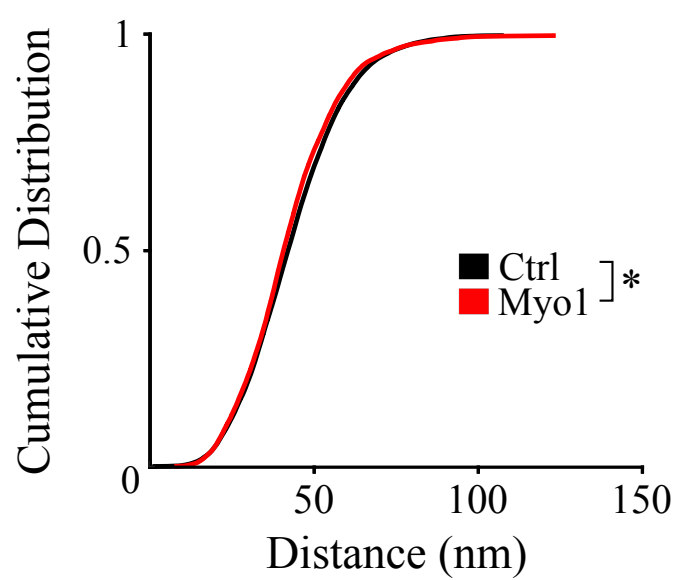

B

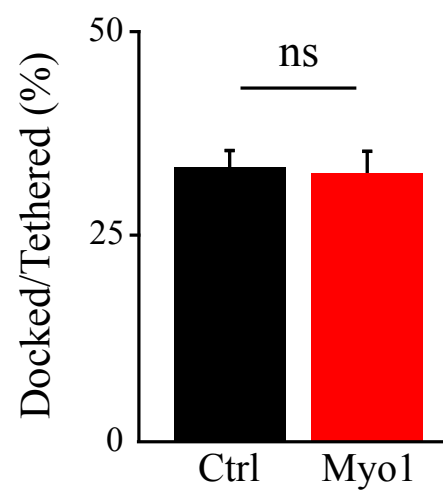

Supplement: supp [file elife_poa_e39440_Figure_3_figure_supplement_1.pdf › elife_poa_e39440_Figure_3_figure_supplement_1.pdf]

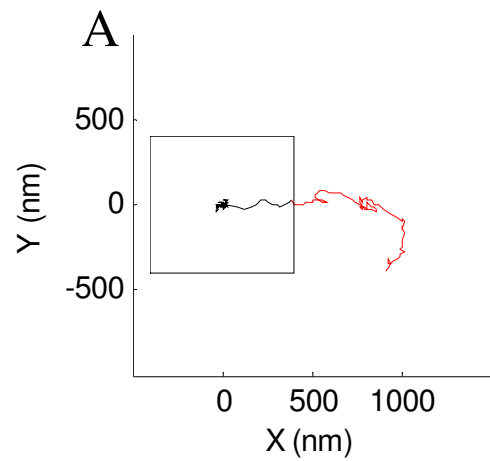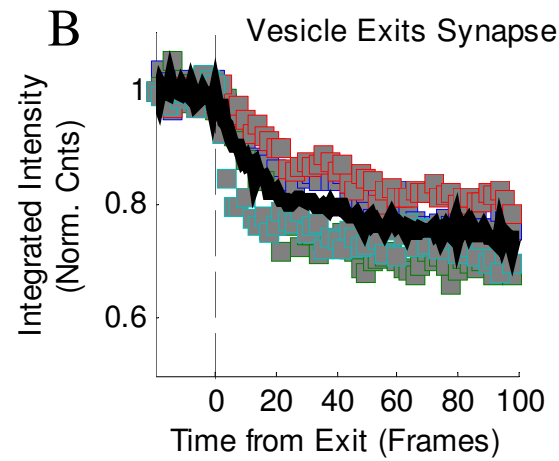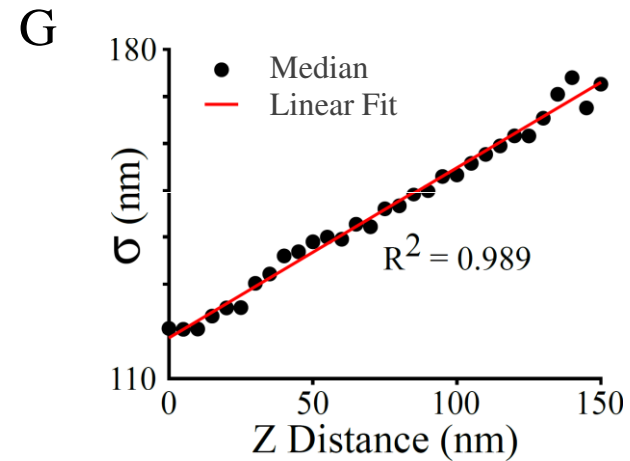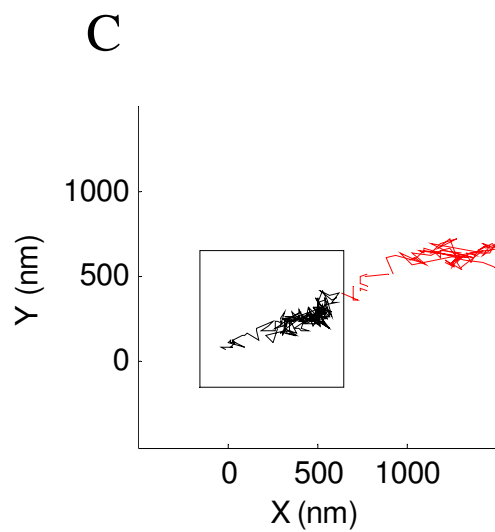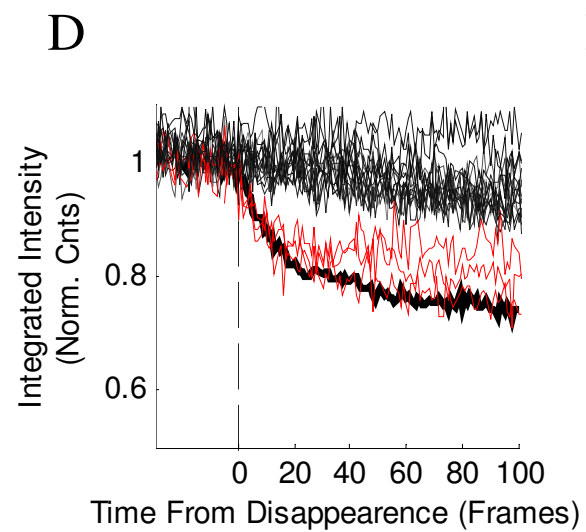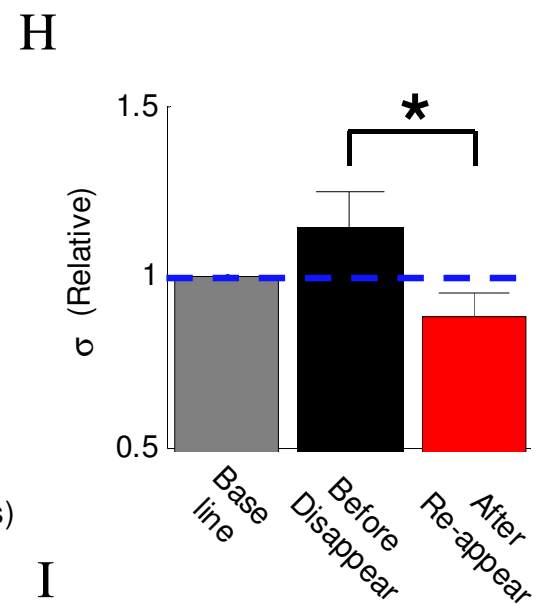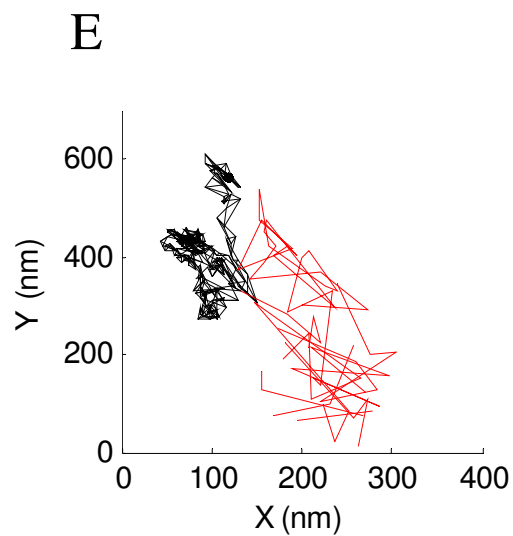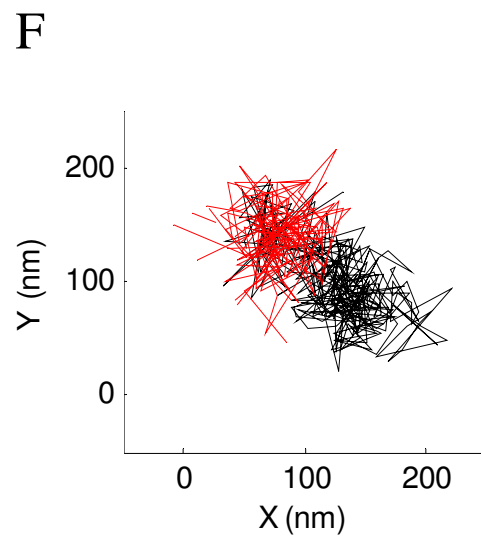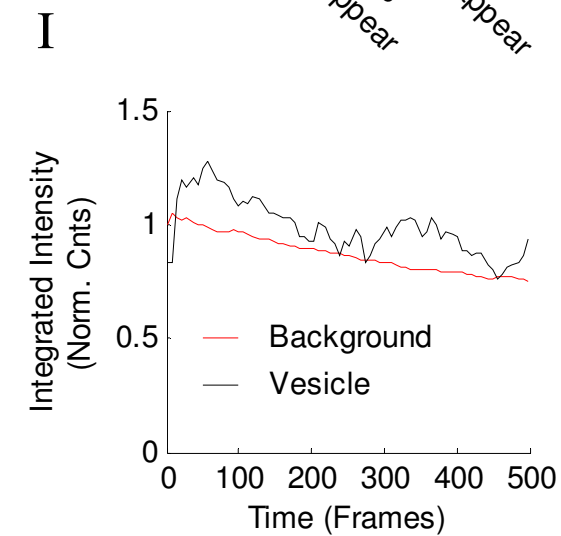

Supplement: supp [file elife_poa_e39440_Figure_4_figure_supplement_1.pdf › elife_poa_e39440_Figure_4_figure_supplement_1.pdf]
